# Supplementary material for: An AlAs/germanene heterostructure with tunable electronic and optical properties via external electric field and strain
Source: Royal Society of Chemistry journal article supplement (doi:10.1039/c6tc02951e), 2016-01-01
Supplement: c6tc02951e1.pdf [file c6tc02951e1.pdf]

# AlAs/germanene heterostructure with tunable electronic and optical properties *via* external electric field and strain

Chunjian Tan,<sup>a,b,‡</sup> Qun Yang,<sup>a,b,‡</sup> Ruishen Meng,<sup>a</sup> Qiuhua Liang,<sup>a</sup> Junke Jiang,<sup>a</sup> Xiang Sun,<sup>b</sup>  
Huaiyu Ye,<sup>a</sup> and X. P. Chen<sup>a,b,\*</sup>

<sup>a</sup>Key Laboratory of Optoelectronic Technology & Systems, Education Ministry of China, Chongqing University and College of Optoelectronic Engineering, Chongqing University, 400044 Chongqing, China

<sup>b</sup>Faculty of Mechanical and Electrical Engineering, Guilin University of Electronic Technology, 541004 Guilin, China

\*Corresponding author: Xianping Chen (E-mail: xianpingchen@cqu.edu.cn; Phone: +86-23-65111178)

<sup>‡</sup>These authors contributed equally to this work.

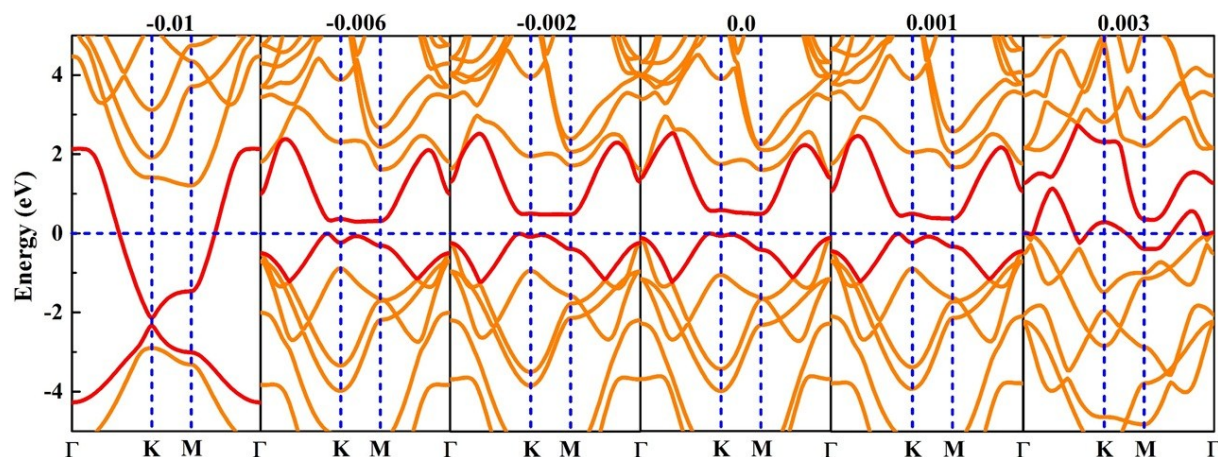

**Figure SI.** Variation of the band structures of the AAI-stacked heterostructure with the change of applied E-field.

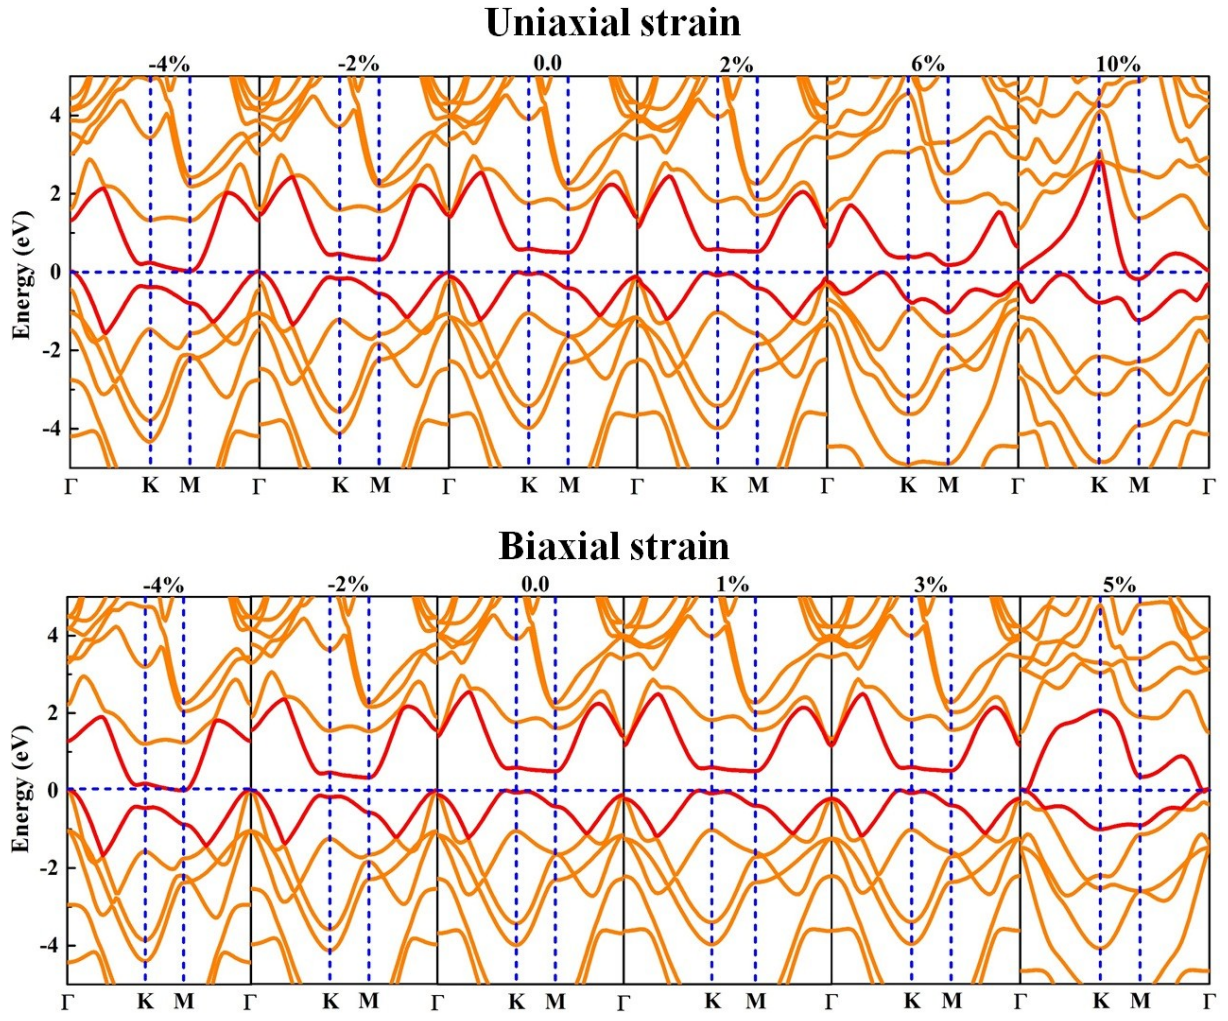

**Figure SII.** Variation of the band structures of the AAI-stacked heterostructure with the change of mechanical strain.
